# Supplementary material for: Molecularly engineered carbon nanostructures derived from Parthenium hysterophorus for ultralow detection of lead(ii) ions
Source: Royal Society of Chemistry journal article supplement (doi:10.1039/d4cy00975d), 2024-12-13
Supplement: d4cy00975d1.pdf [file d4cy00975d1.pdf]

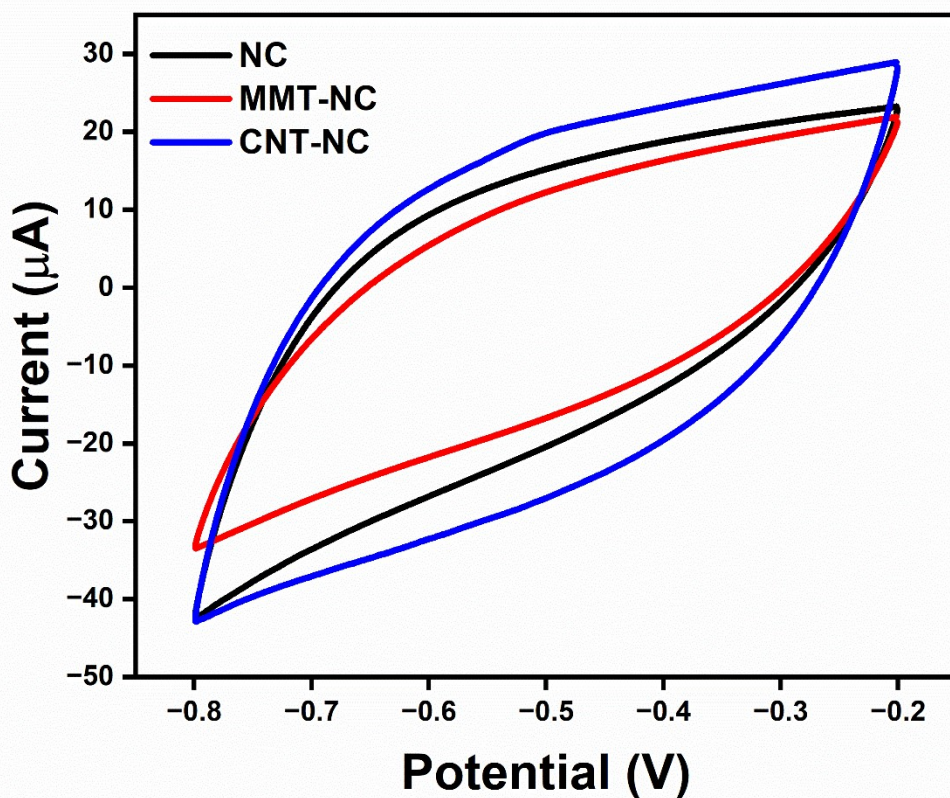

**Fig. S1** Cyclic voltammetric response of NC, MMT-NC and CNT-NC modified GCE in the presence of 0.1 M acetate buffer

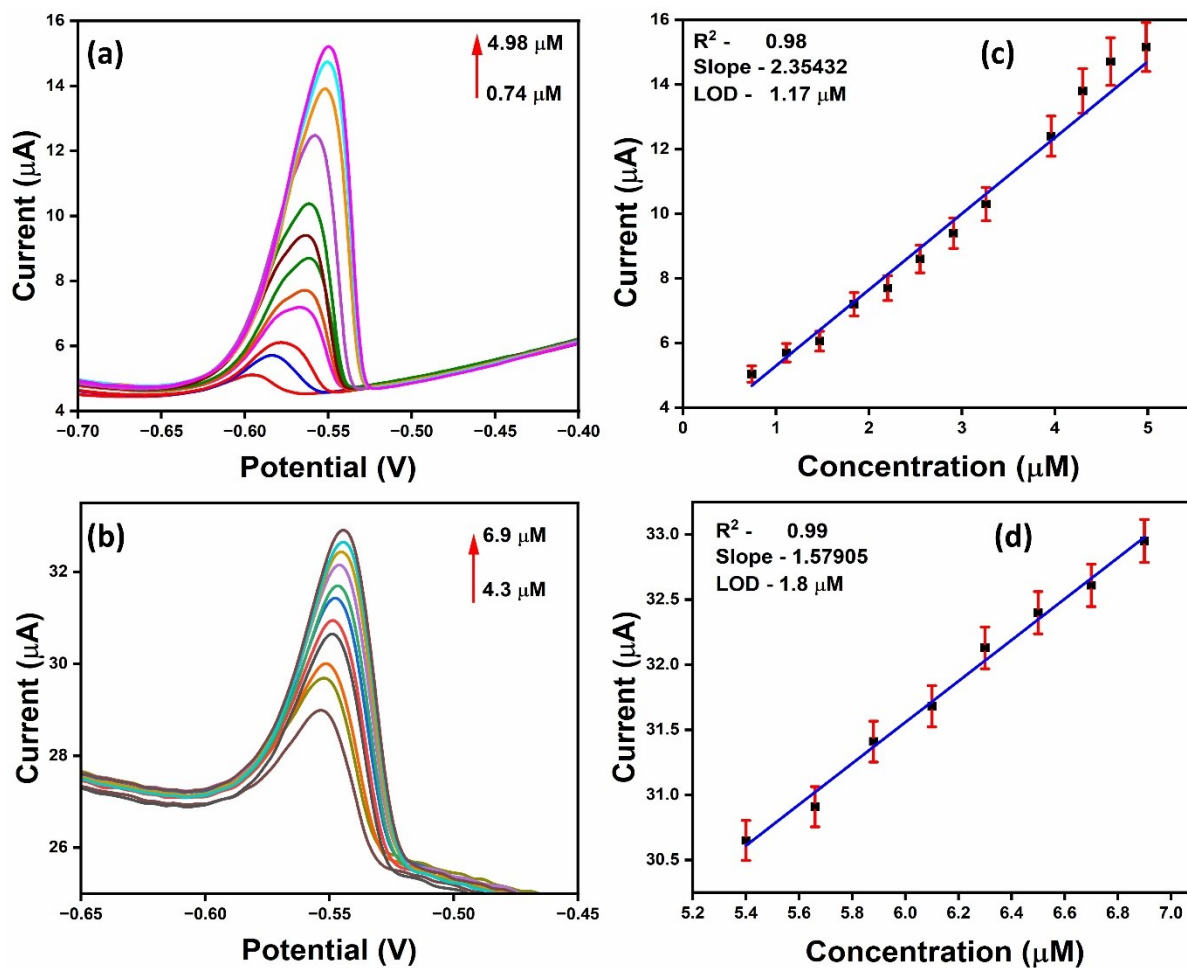

**Fig. S2** DPASV response of CNT-NC modified GCE with varying concentrations of lead in (a) river water, (b) groundwater, linear relationship between obtained current and lead concentrations of (c) river water and (d) groundwater
